# Supplementary material for: Novel stereoselective syntheses of N-octyl-β-valienamine (NOV) and N-octyl-4-epi-β-valienamine (NOEV) from (−)-shikimic acid
Source: Royal Society of Chemistry journal article supplement (doi:10.1039/c9ra09235h), 2019-01-01

## Supporting Information

### Novel Stereoselective Syntheses of *N*-Octyl- $\beta$ -Valienamine (NOV) and *N*-Octyl-4-*epi*- $\beta$ -Valienamine (NOEV) from (–)-Shikimic Acid

Feng-Lei Li,<sup>a</sup> Jiang-Ping Yu,<sup>a</sup> Wei Ding,<sup>a</sup> Mian-Mian Sun,<sup>a</sup> Yun-Gang He,<sup>a</sup> Xing-Liang Zhu,<sup>a</sup> Shi-Ling Liu\*,<sup>b</sup> and Xiao-Xin Shi\*<sup>a</sup>

<sup>a</sup> Engineering Research Center of Pharmaceutical Process Chemistry of the Ministry of Education, East China University of Science and Technology, 130 Mei-Long Road, Shanghai 200237, P. R. China.

<sup>b</sup> Shanghai Qingping Pharmaceutical Co. Ltd., 397 Zhao-Jiang Road, Baihe Town, Qingpu District, Shanghai 201710, P. R. China.

E-mail: xxshi@ecust.edu.cn; liushiling@tenrypharm.com

### Contents

<sup>1</sup>H and <sup>13</sup>C NMR Spectra of All Compounds..... S2-S15

# <sup>1</sup>H NMR Spectrum (500 MHz, CD<sub>3</sub>COCD<sub>3</sub>) of Compound 3:

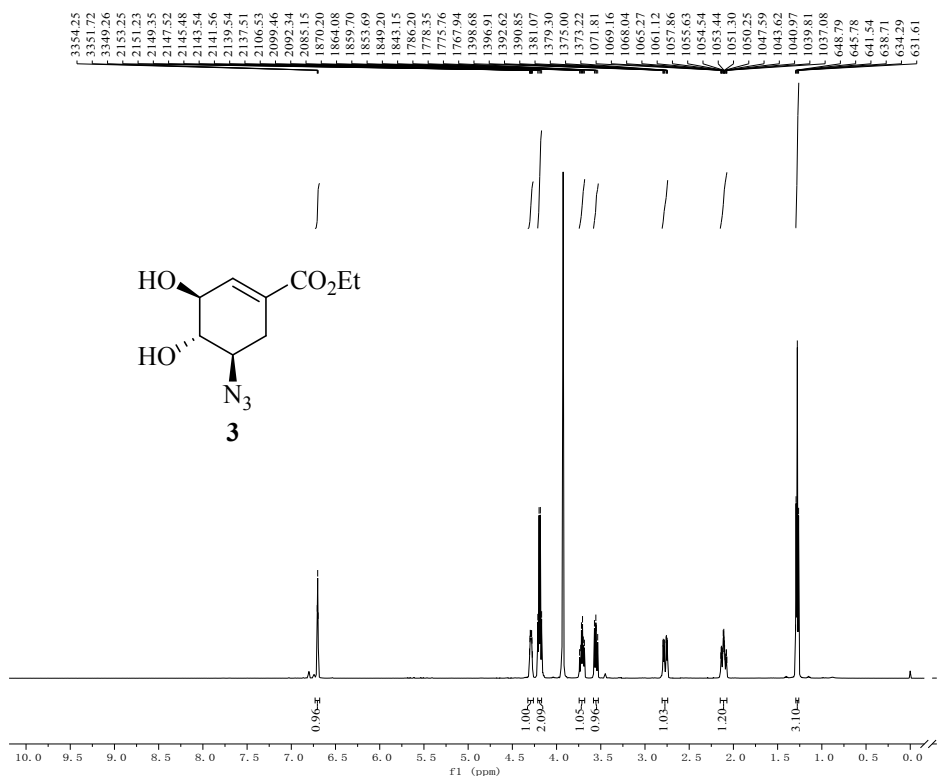

Current Data Parameters  
 NAME SXX-qp-11  
 EXPNO 1  
 PROCNO 1

F2 - Acquisition Parameters  
 Date\_ 20130411  
 Time 12.36  
 INSTRUM spect  
 PROBHD 5 mm QNP 1H/13  
 PULPROG zg30  
 TD 65536  
 SOLVENT Acetone  
 NS 8  
 DS 0  
 SWH 15015.015 Hz  
 FIDRES 0.229111 Hz  
 AQ 2.1824322 sec  
 RG 16  
 DW 33.300 usec  
 DE 6.50 usec  
 TE 300.0 K  
 D1 2.0000000 sec  
 TD0 1

==== CHANNEL f1 =====  
 NUC1 1H  
 P1 10.50 usec  
 PL -4.00 dB  
 SFO1 500.1304556 MHz

F2 - Processing parameters  
 SI 32768  
 SF 500.1299007 MHz  
 WDW no  
 SSB 0  
 LB 0.00 Hz  
 GB 0  
 PC 1.00

# <sup>13</sup>C NMR Spectrum (100 MHz, CDCl<sub>3</sub>) of Compound 3:

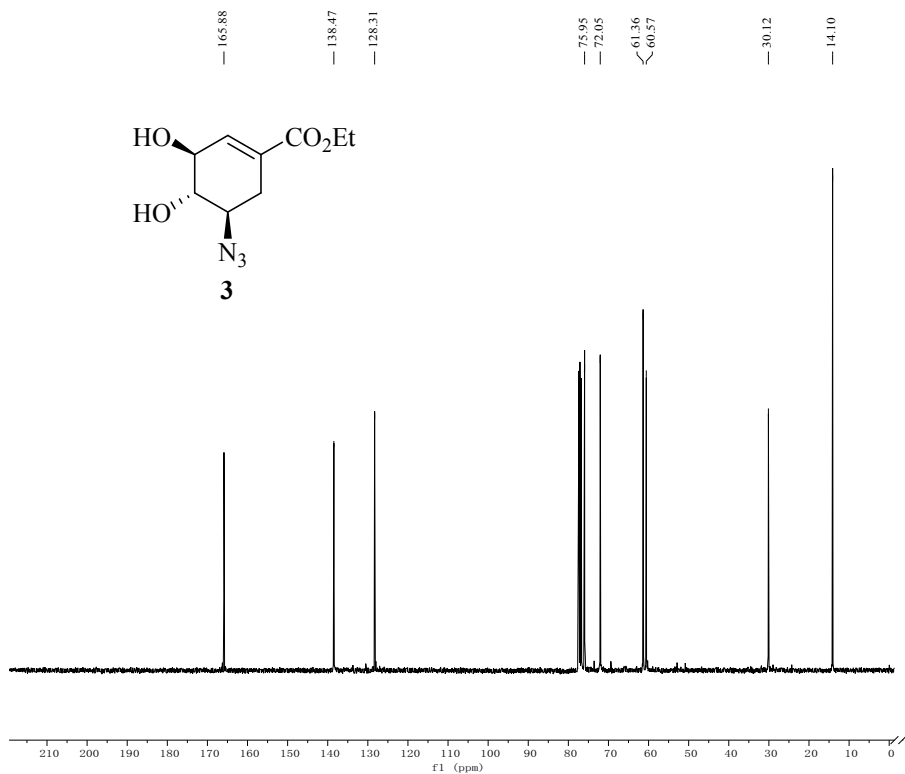

NAME sxx-qp-11  
 EXPNO 10  
 PROCNO 1  
 Date\_ 20121114  
 Time 4.25  
 INSTRUM spect  
 PROBHD 5 mm PABBO BB-  
 PULPROG zgpg30  
 TD 65536  
 SOLVENT CDCl3  
 NS 400  
 DS 0  
 SWH 24038.461 Hz  
 FIDRES 0.366798 Hz  
 AQ 1.3631988 sec  
 RG 203  
 DW 20.800 usec  
 DE 6.50 usec  
 TE 295.0 K  
 D1 2.0000000 sec  
 D11 0.0300000 sec  
 TD0 1

==== CHANNEL f1 =====  
 NUC1 13C  
 P1 9.85 usec  
 PL1 -2.20 dB  
 PL1W 60.02919006 W  
 SFO1 100.6228298 MHz

==== CHANNEL f2 =====  
 CPDPRG2 waltz16  
 NUC2 1H  
 PCPD2 90.00 usec  
 PL2 -1.00 dB  
 PL12 14.71 dB  
 PL13 17.90 dB  
 PL2W 13.37643433 W  
 PL12W 0.35920334 W  
 PL13W 0.17232187 W  
 SFO2 400.1316005 MHz  
 SI 32768  
 SF 100.6127690 MHz  
 WDW EM  
 SSB 0  
 LB 1.00 Hz  
 GB 0  
 PC 1.40

<sup>1</sup>H NMR (400 MHz, CDCl<sub>3</sub>) spectrum of compound 4:

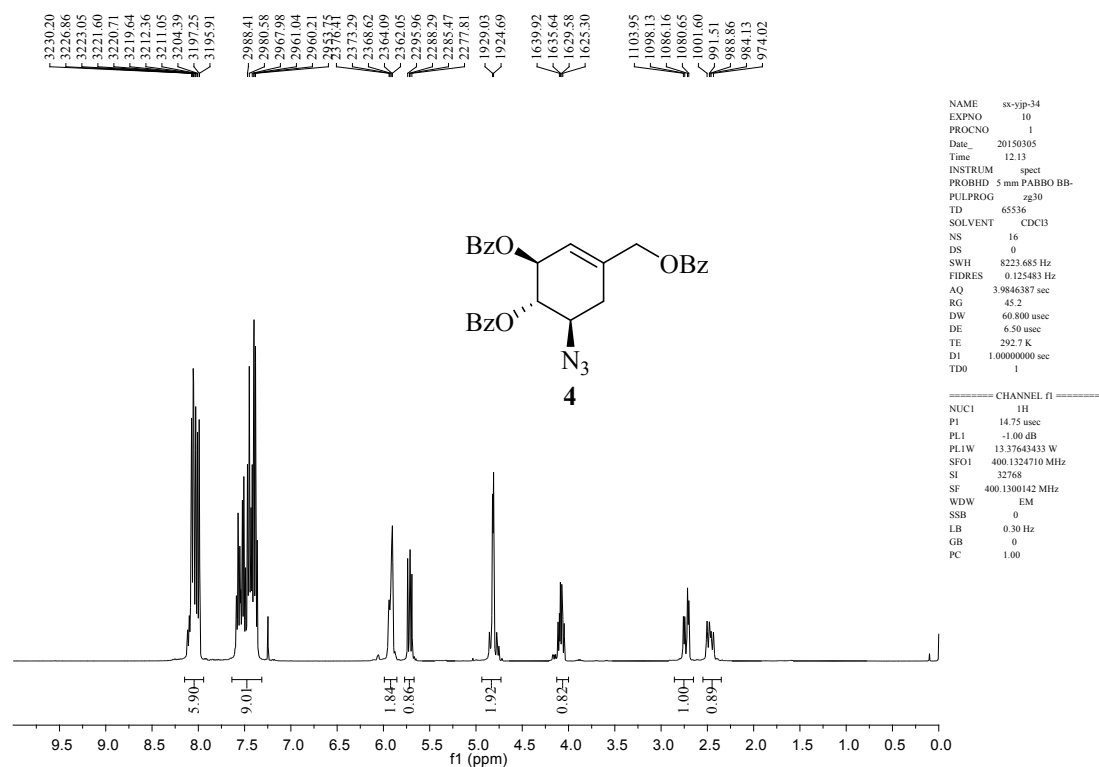

<sup>13</sup>C NMR (100 MHz, CDCl<sub>3</sub>) spectrum of compound 4:

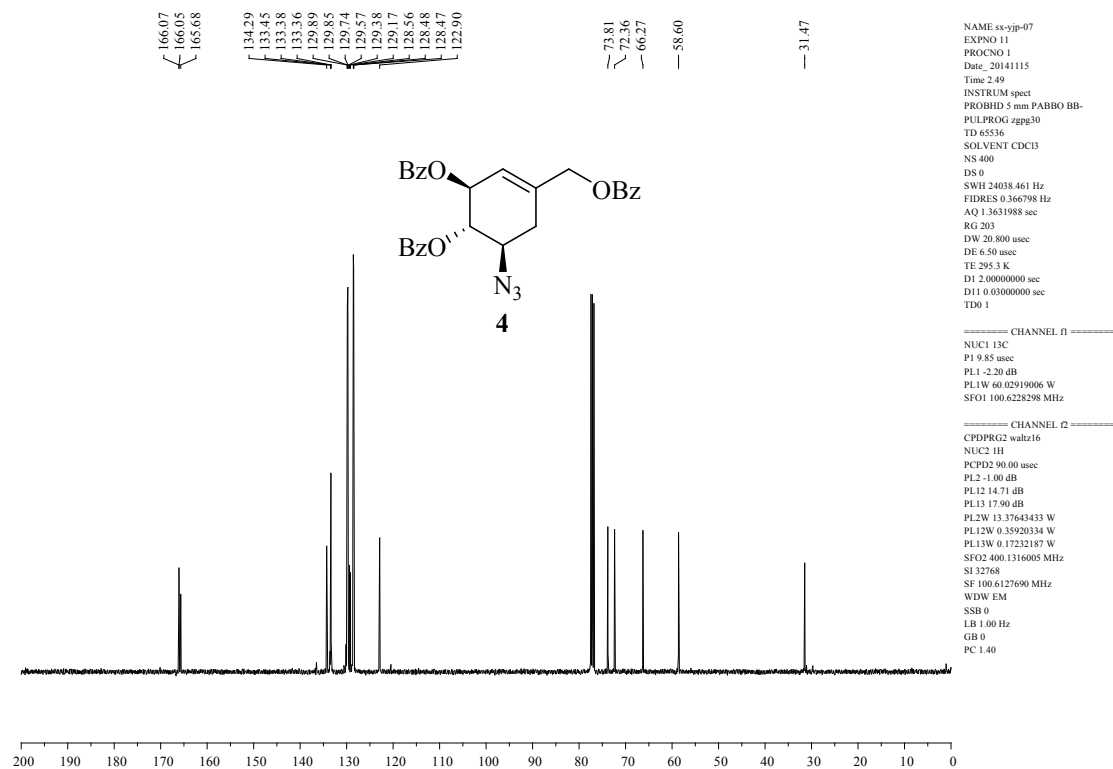

<sup>1</sup>H NMR (400 MHz, CDCl<sub>3</sub>) of spectrum of compound **5**:

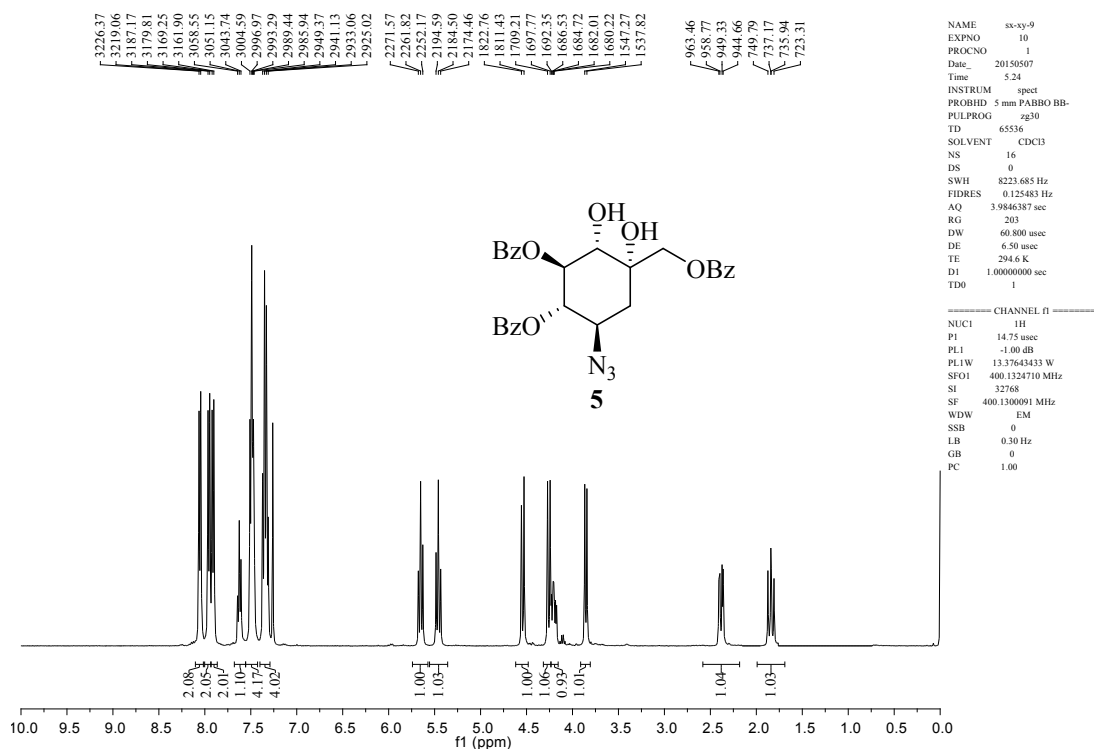

<sup>13</sup>C NMR (100 MHz, CDCl<sub>3</sub>) spectrum of compound **5**:

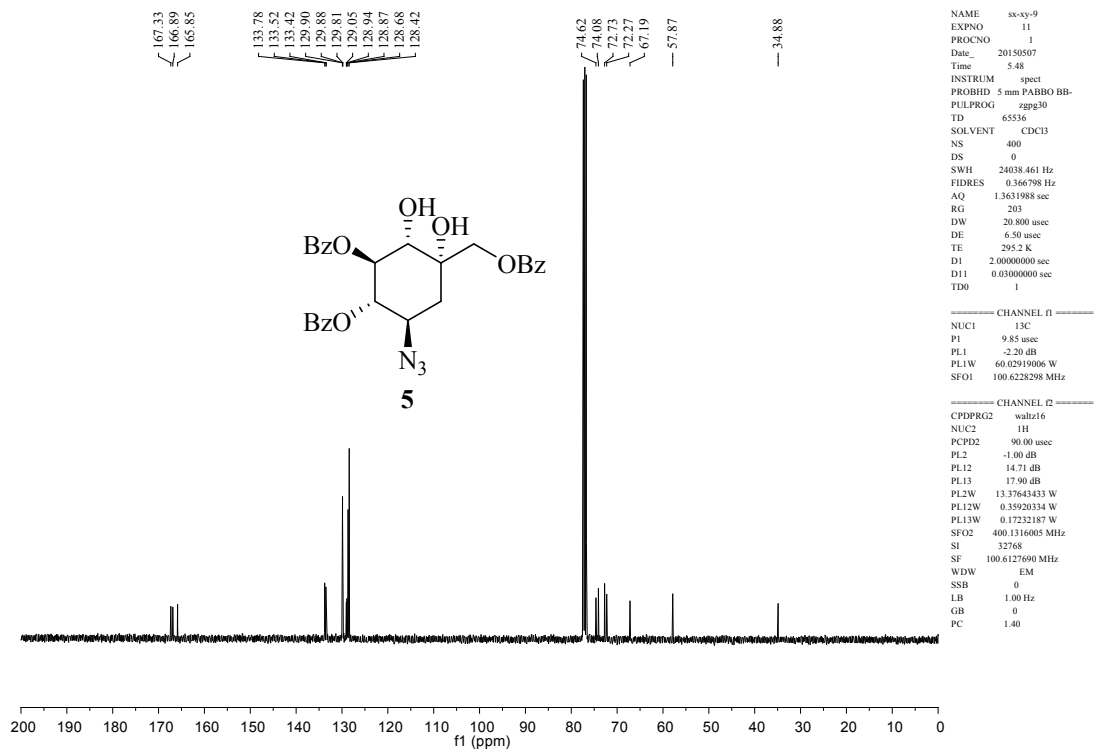

<sup>1</sup>H NMR (400 MHz, CDCl<sub>3</sub>) spectrum of compound **6**:

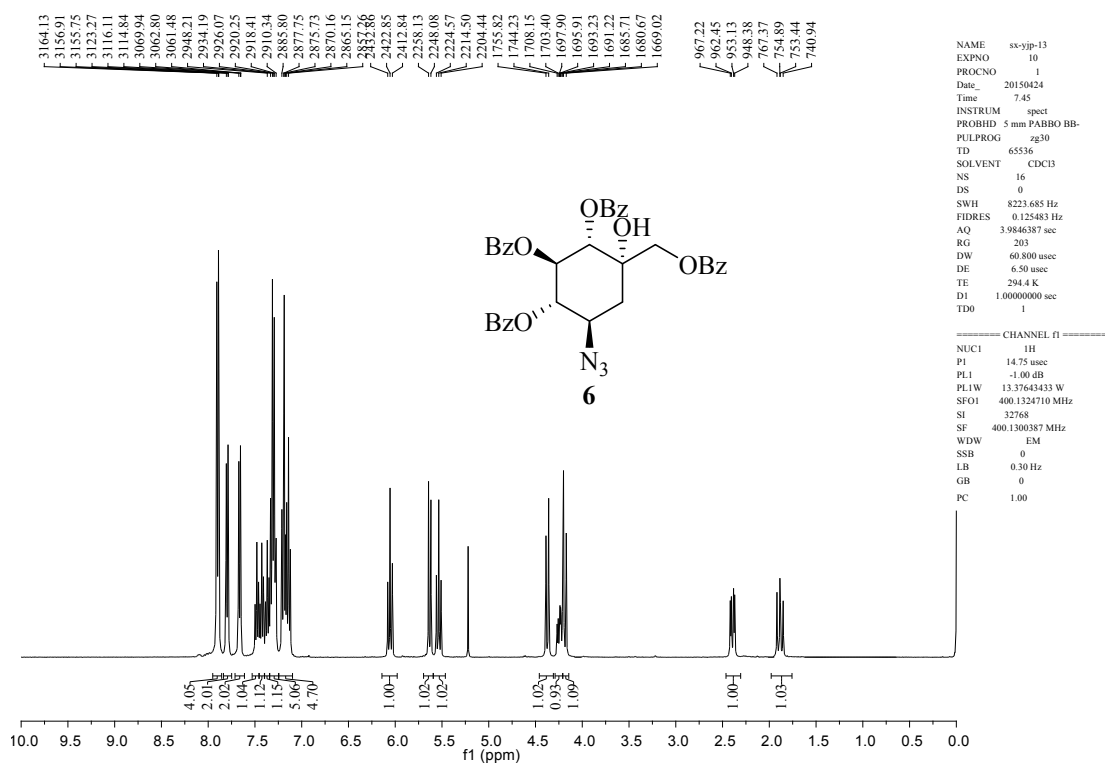

<sup>13</sup>C NMR (100 MHz, CDCl<sub>3</sub>) spectrum of compound **6**:

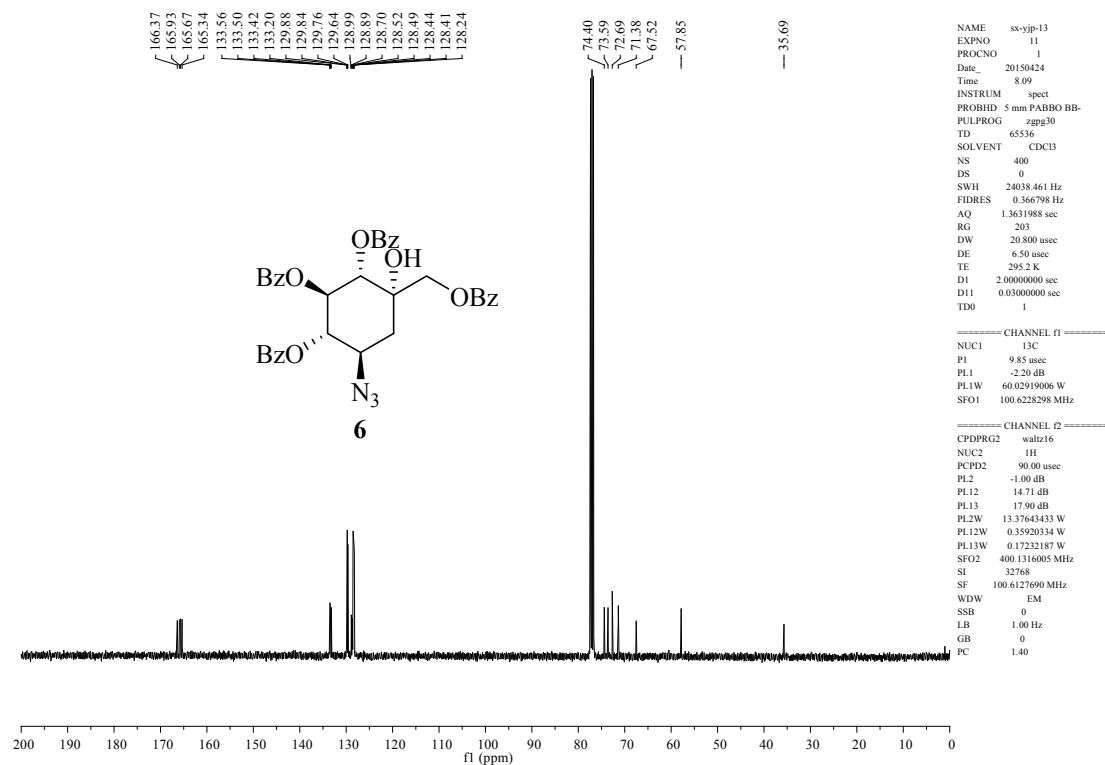

<sup>1</sup>H NMR (400 MHz, CDCl<sub>3</sub>) spectrum of compound 7:

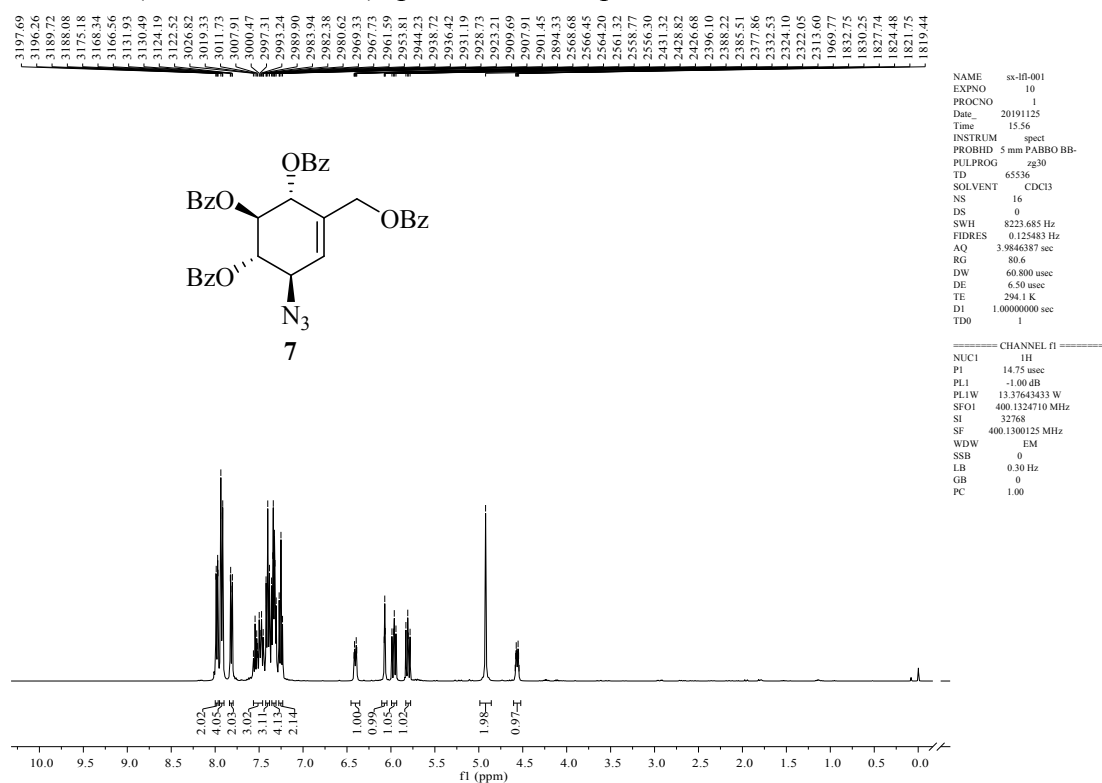

<sup>13</sup>C NMR (100 MHz, CDCl<sub>3</sub>) spectrum of compound 7:

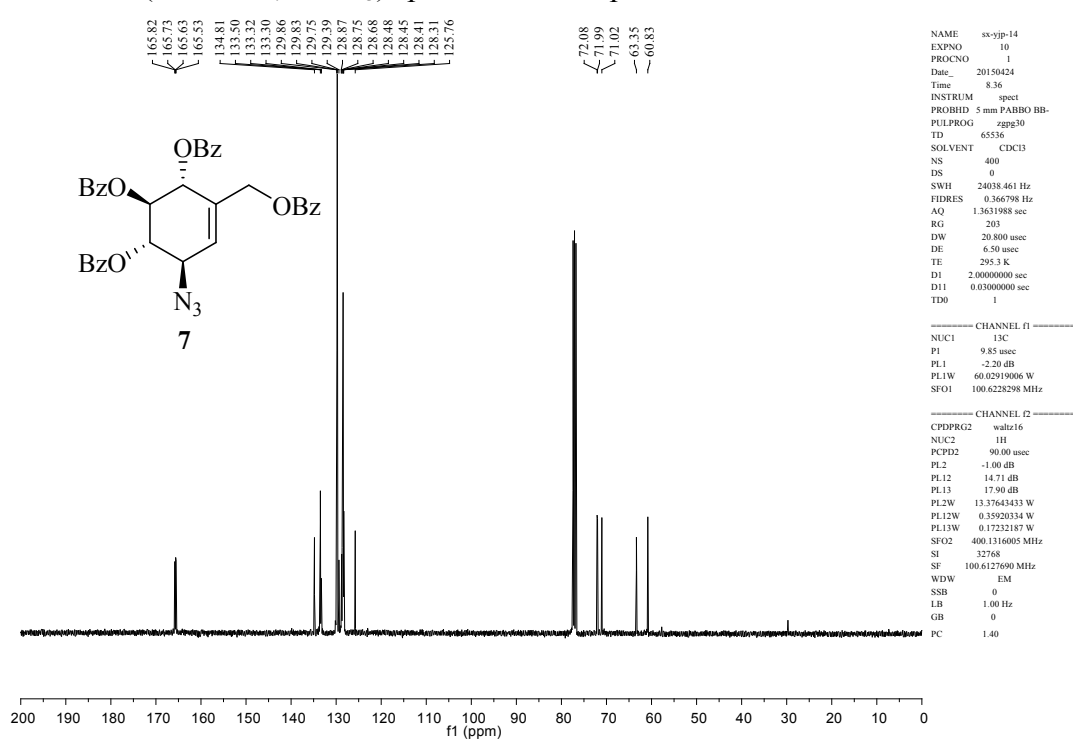

<sup>1</sup>H NMR (400 MHz, CDCl<sub>3</sub>) spectrum of compound **8**:

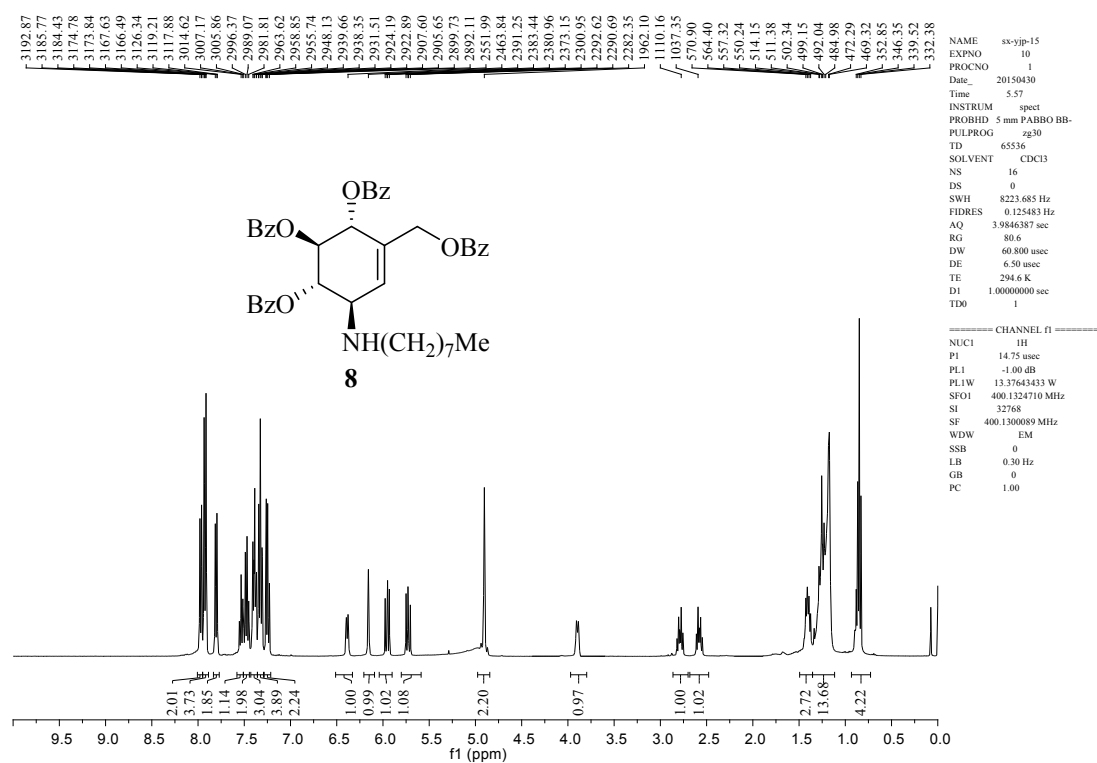

<sup>13</sup>C NMR (100 MHz, CDCl<sub>3</sub>) spectrum of compound **8**:

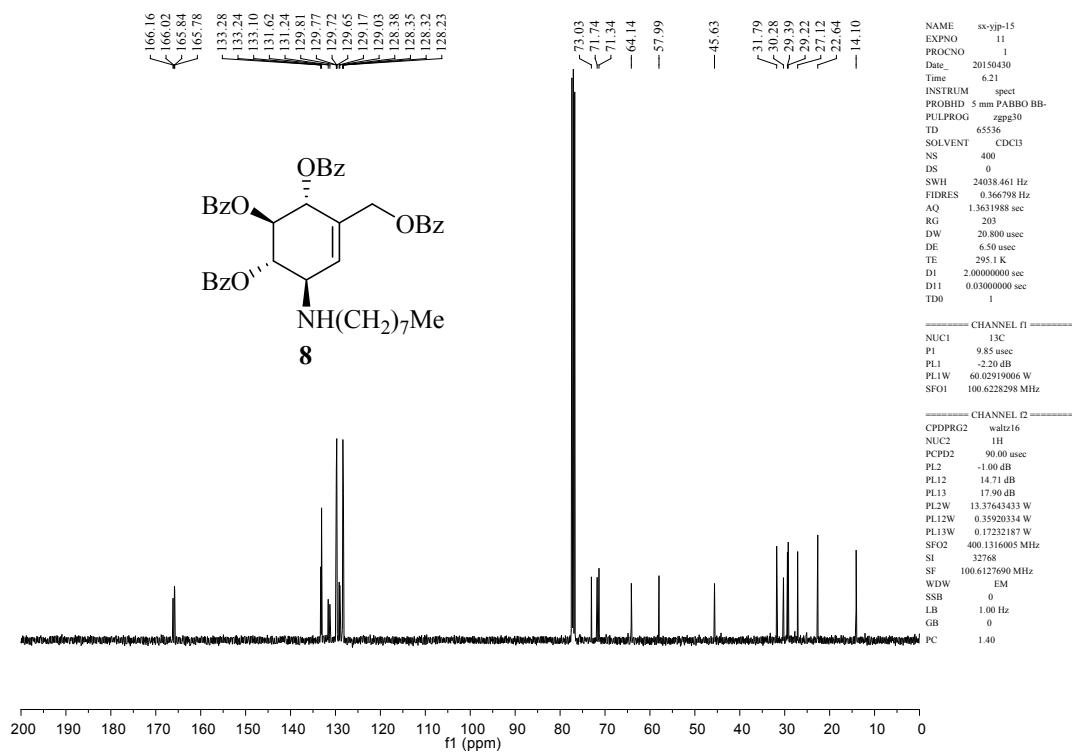

<sup>1</sup>H NMR (400 MHz, CD<sub>3</sub>OD) spectrum of NOV 1:

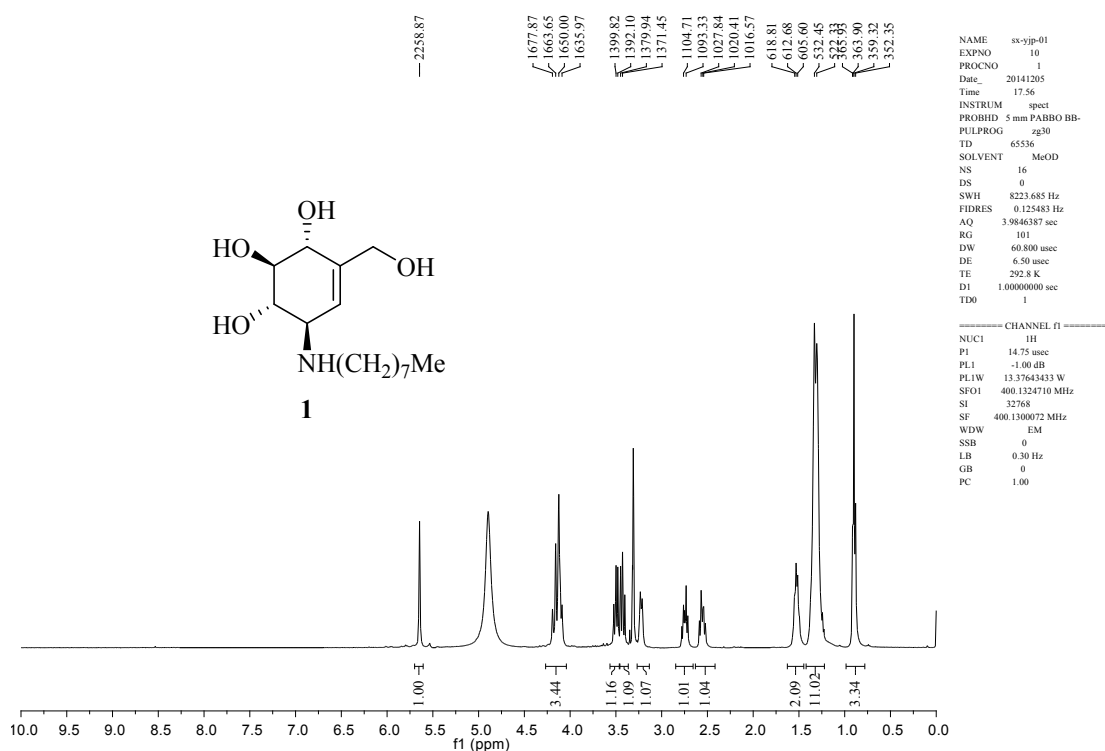

<sup>13</sup>C NMR (100 MHz, CD<sub>3</sub>OD) spectrum of NOV 1:

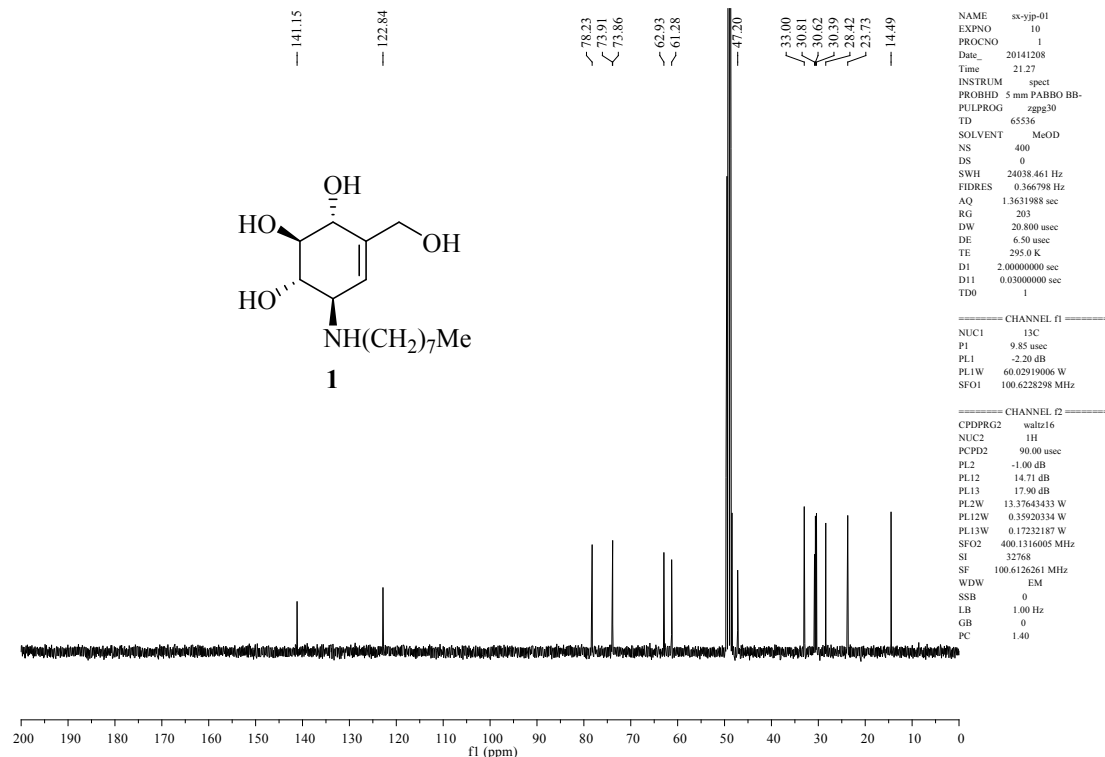



<sup>1</sup>H NMR (400 MHz, CDCl<sub>3</sub>) spectrum of compound **9**:

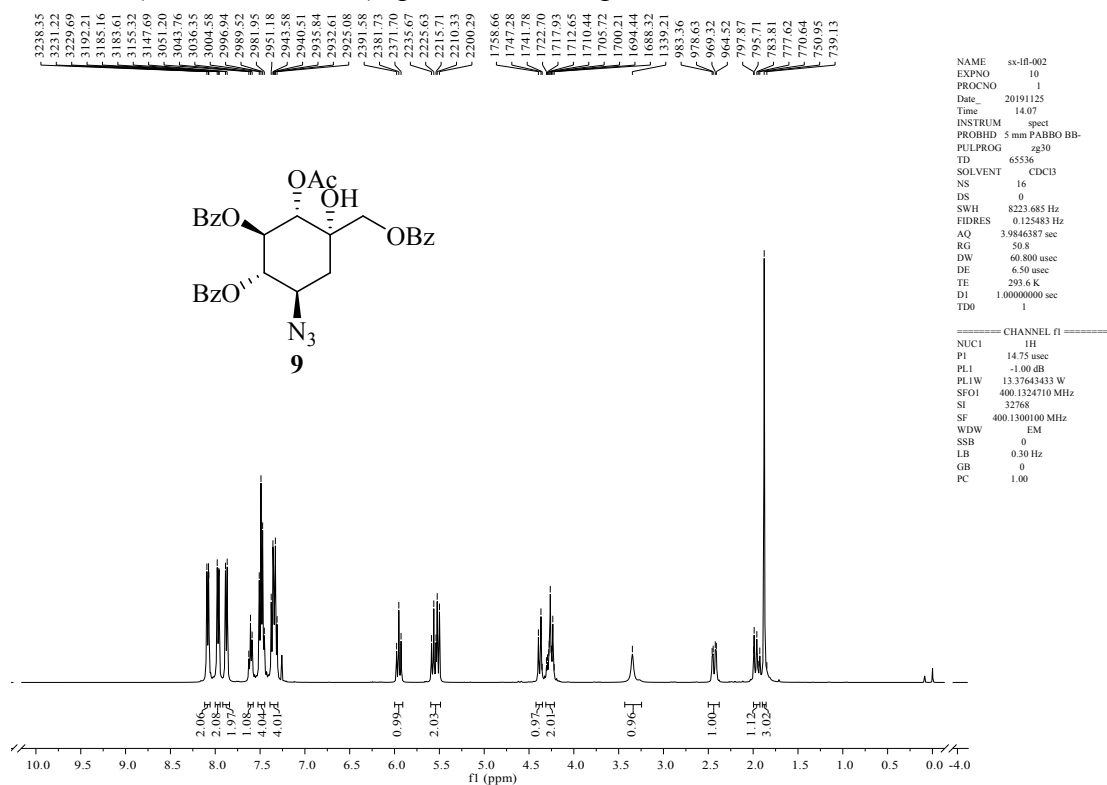

<sup>13</sup>C NMR (100 MHz, CDCl<sub>3</sub>) spectrum of compound **9**:

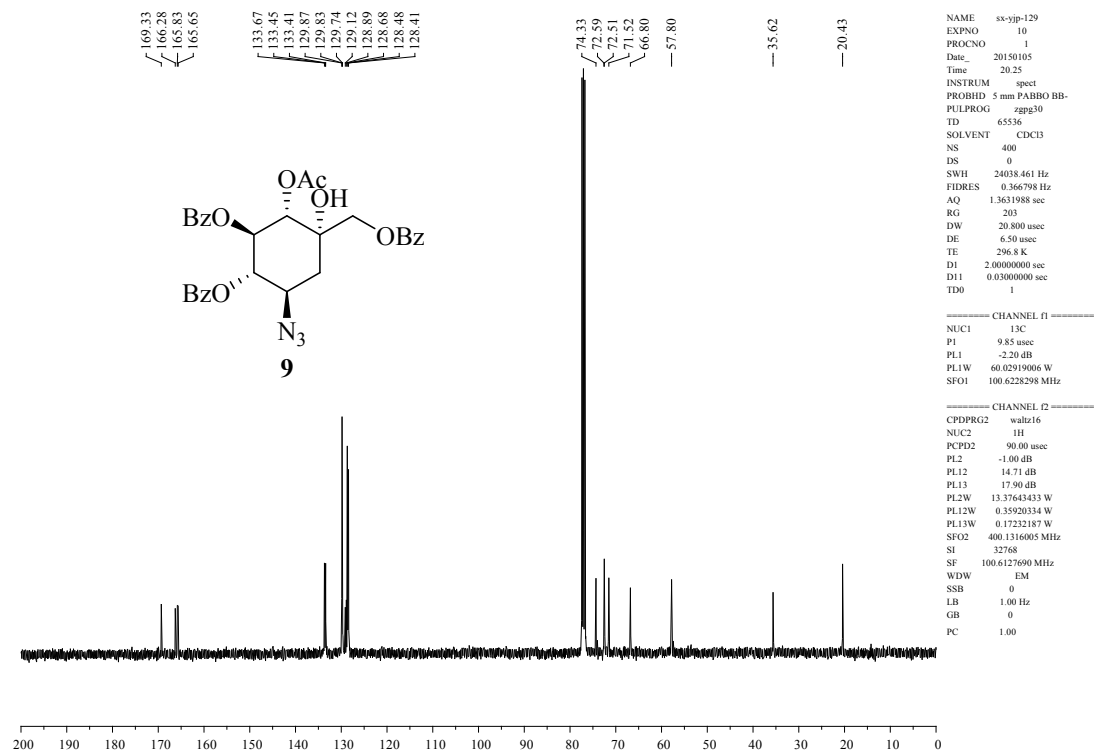

<sup>1</sup>H NMR (400 MHz, CDCl<sub>3</sub>) spectrum of compound **10**:

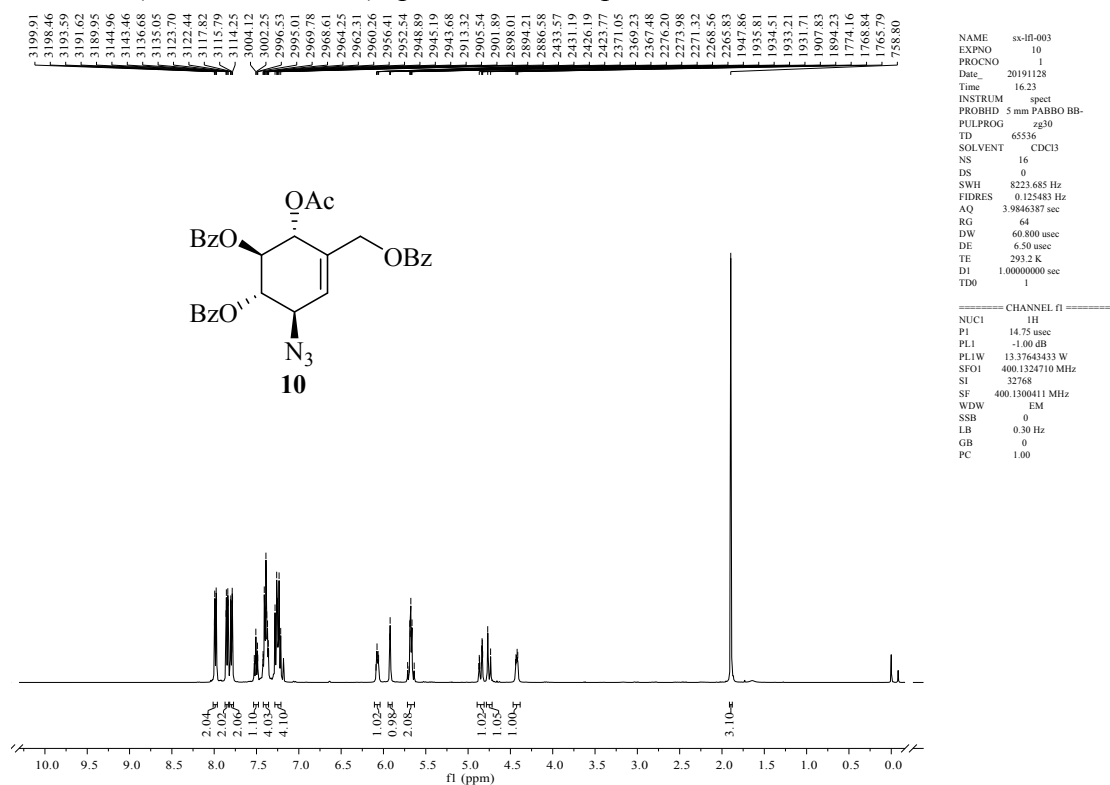

<sup>13</sup>C NMR (100 MHz, CDCl<sub>3</sub>) spectrum of compound **10**:

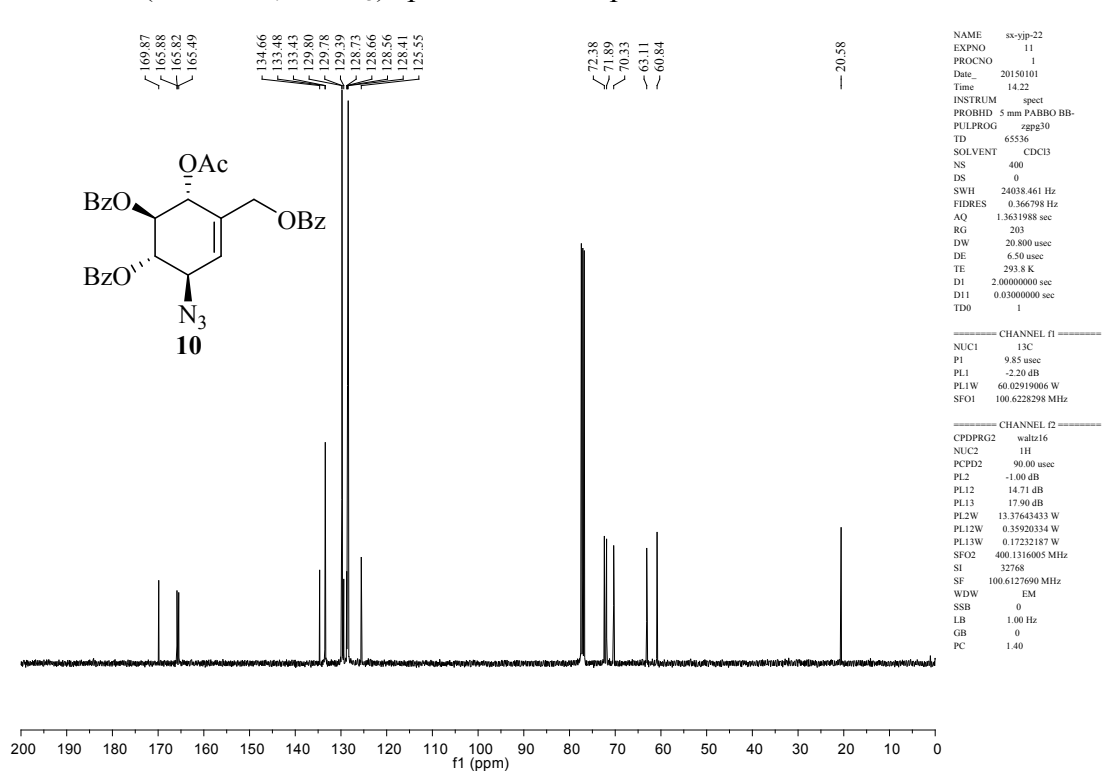

<sup>1</sup>H NMR (400 MHz, CDCl<sub>3</sub>) spectrum of compound **11**:

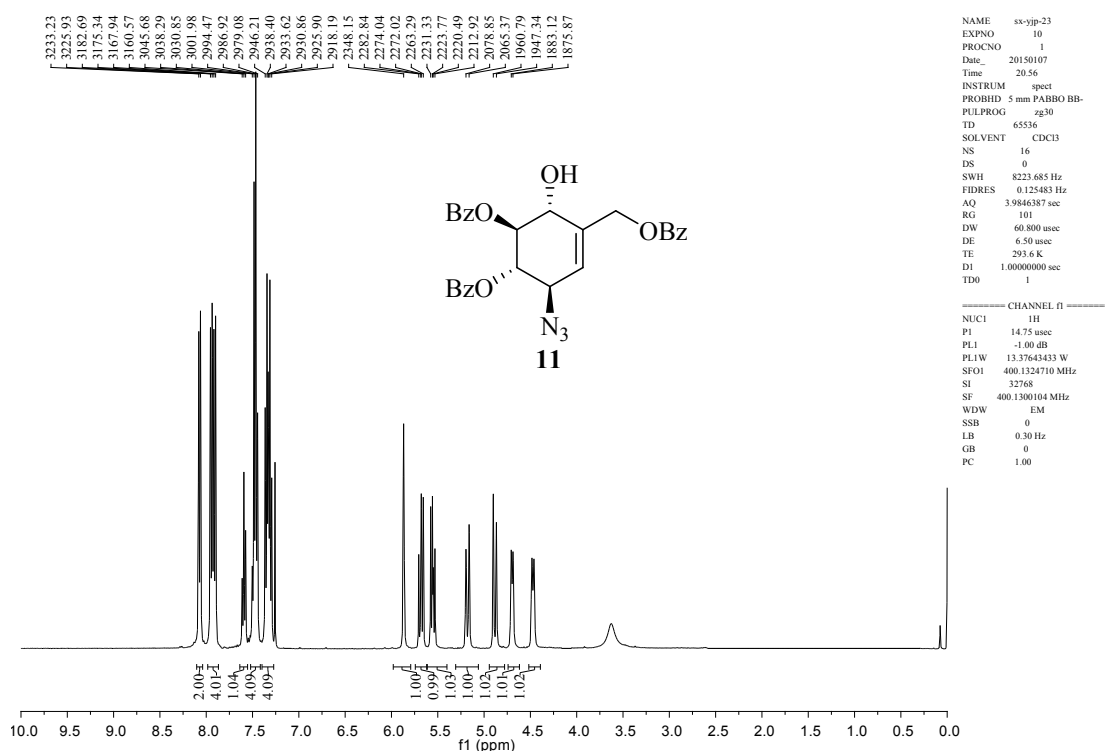

<sup>13</sup>C NMR (100 MHz, CDCl<sub>3</sub>) spectrum of compound **11**:

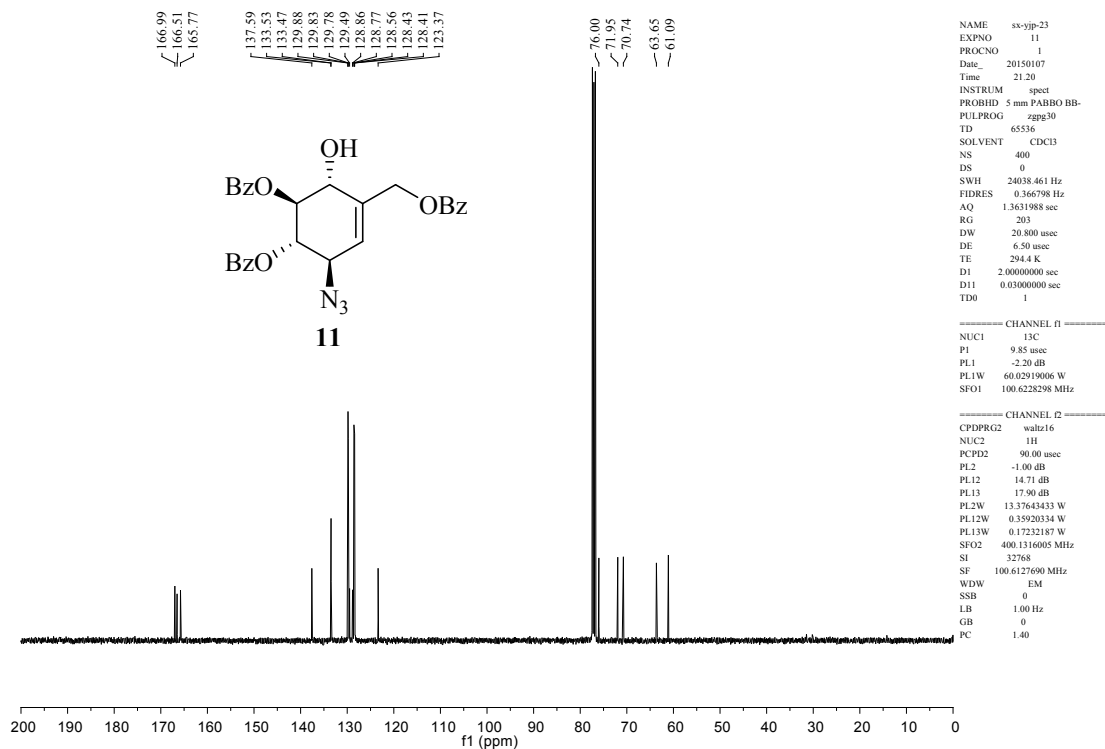

<sup>1</sup>H NMR (400 MHz, CDCl<sub>3</sub>) spectrum of compound **12**:

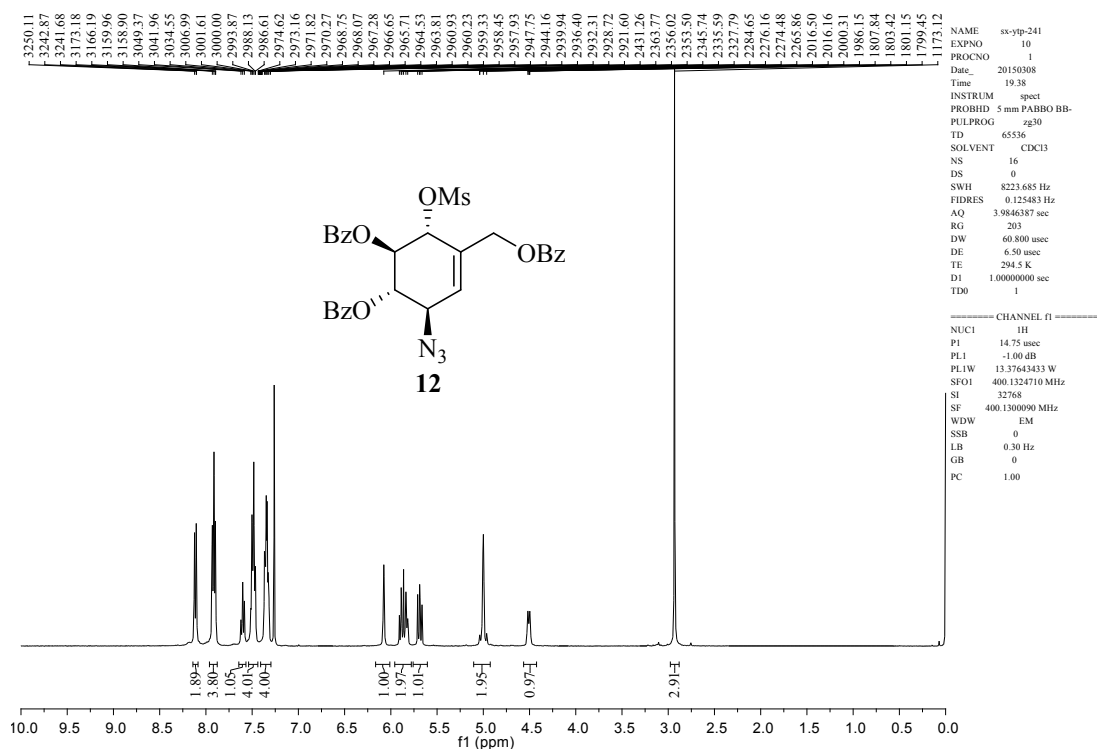

<sup>13</sup>C NMR (100 MHz, CDCl<sub>3</sub>) spectrum of compound **12**:

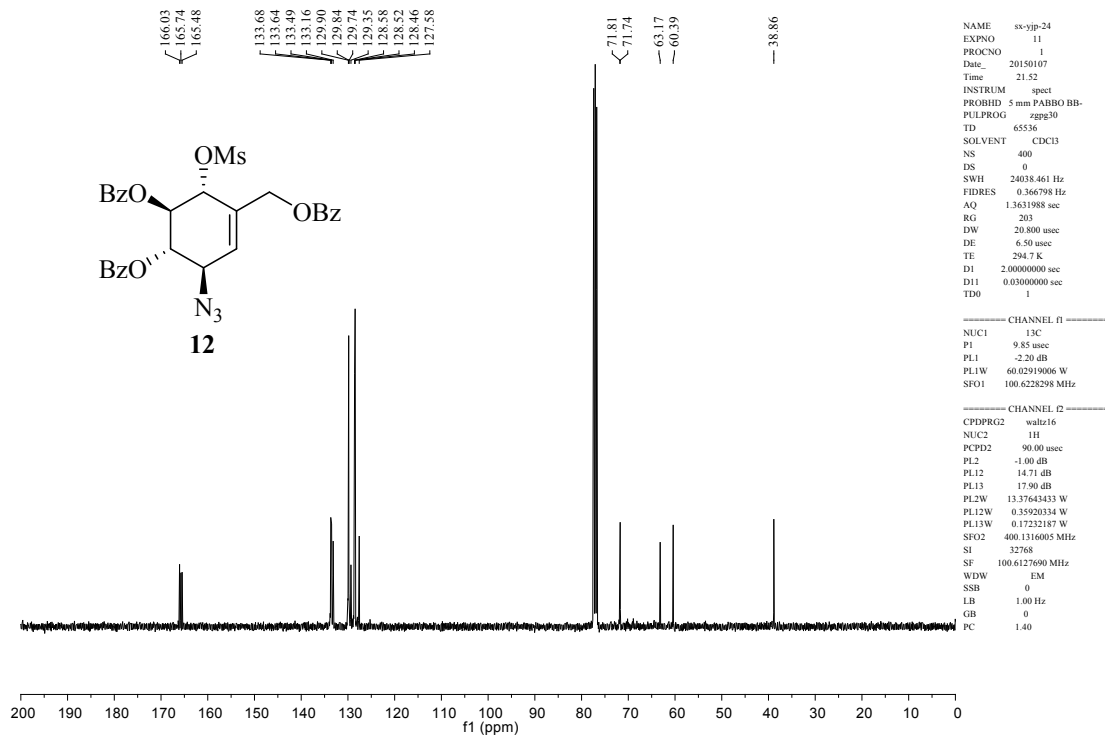

<sup>1</sup>H NMR (400 MHz, CDCl<sub>3</sub>) spectrum of compound **13**:

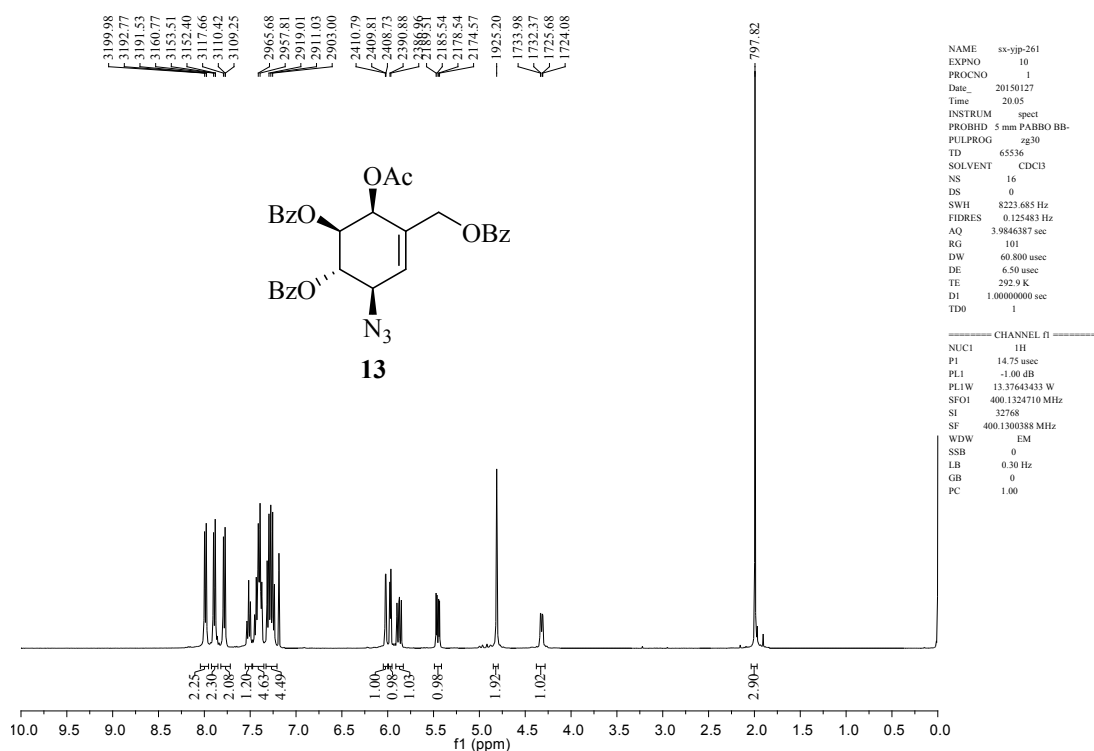

<sup>13</sup>C NMR (100 MHz, CDCl<sub>3</sub>) spectrum of compound **13**:

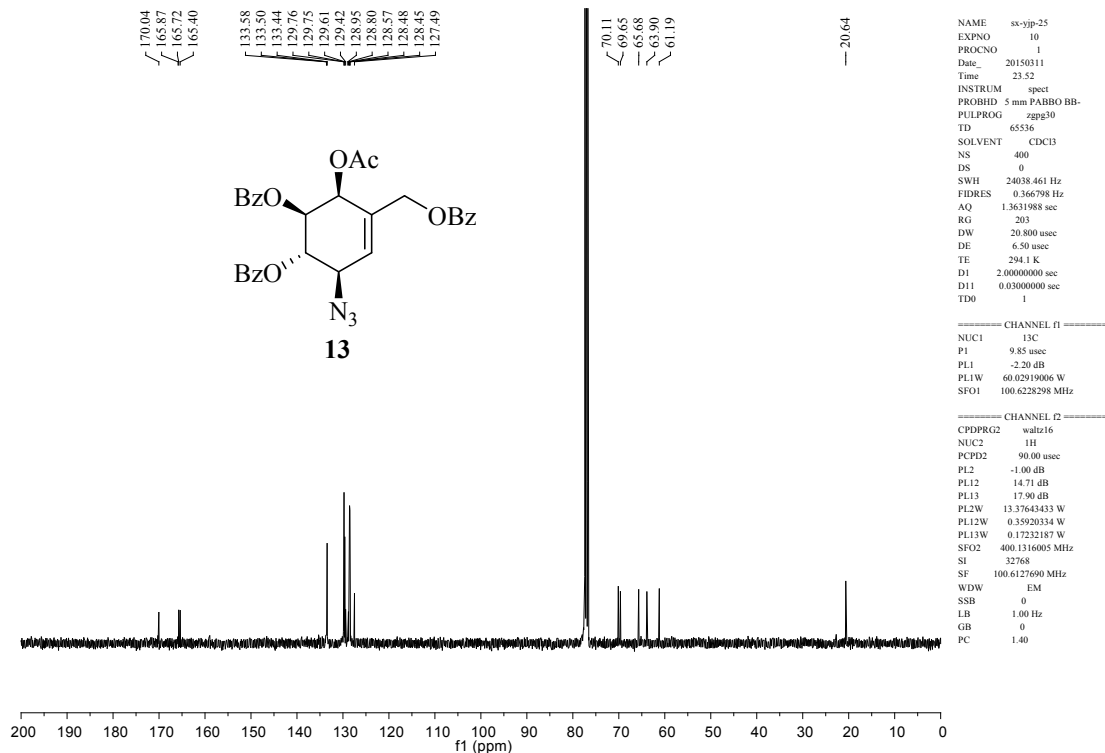

<sup>1</sup>H NMR (400 MHz, CDCl<sub>3</sub>) spectrum of compound **14**:

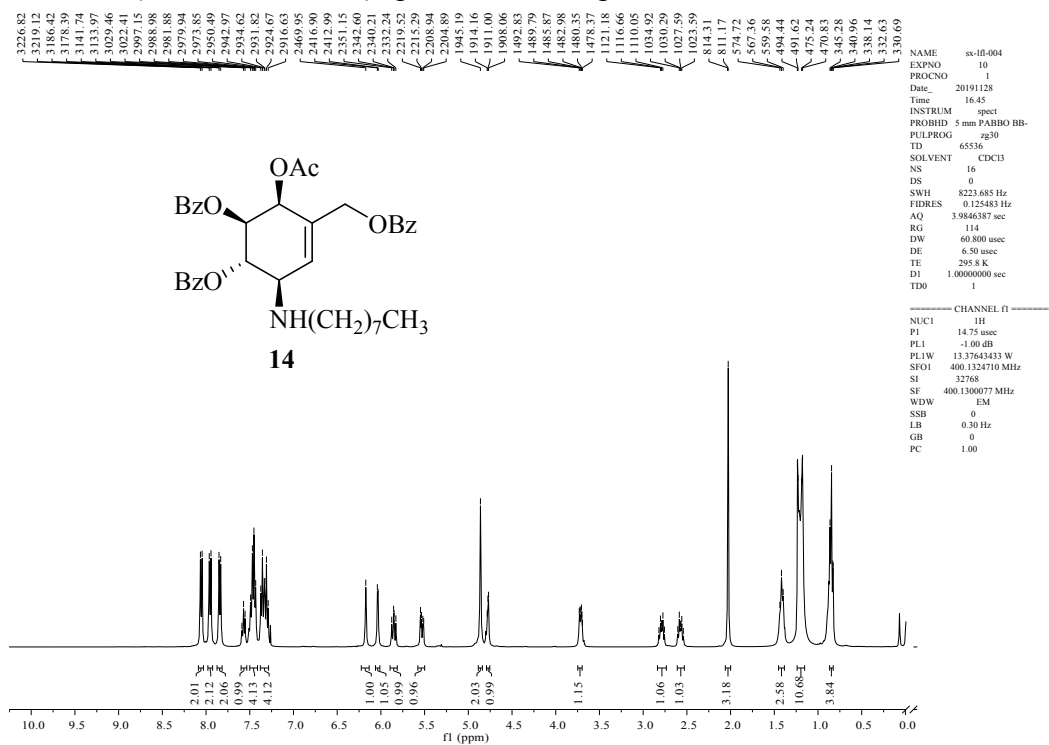

<sup>13</sup>C NMR (100 MHz, CDCl<sub>3</sub>) spectrum of compound **14**:

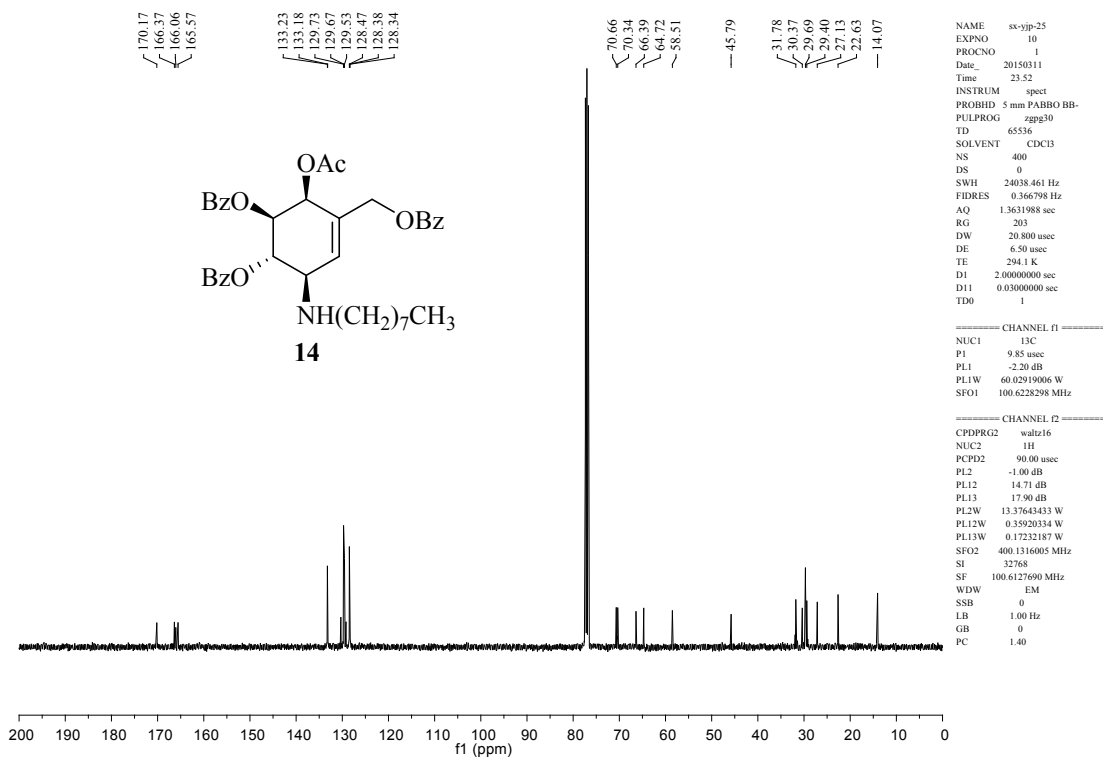

<sup>1</sup>H NMR (400 MHz, CD<sub>3</sub>OD) spectrum of NOEV 2:

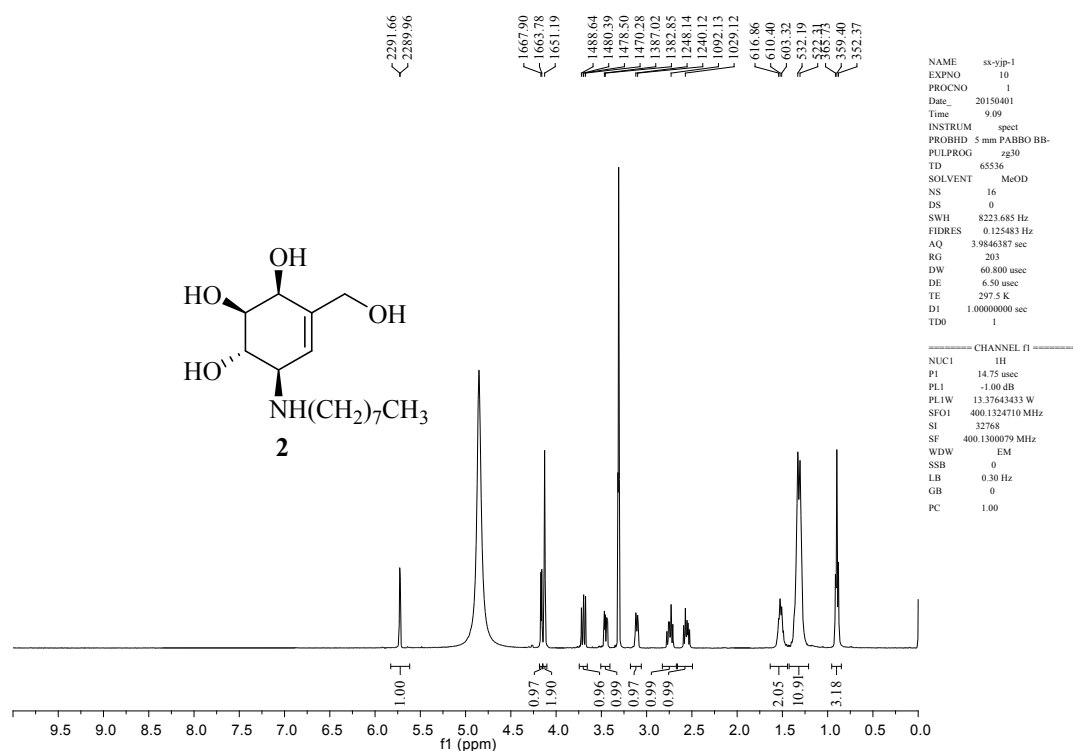

<sup>13</sup>C NMR (100 MHz, CD<sub>3</sub>OD) spectrum of NOEV 2:

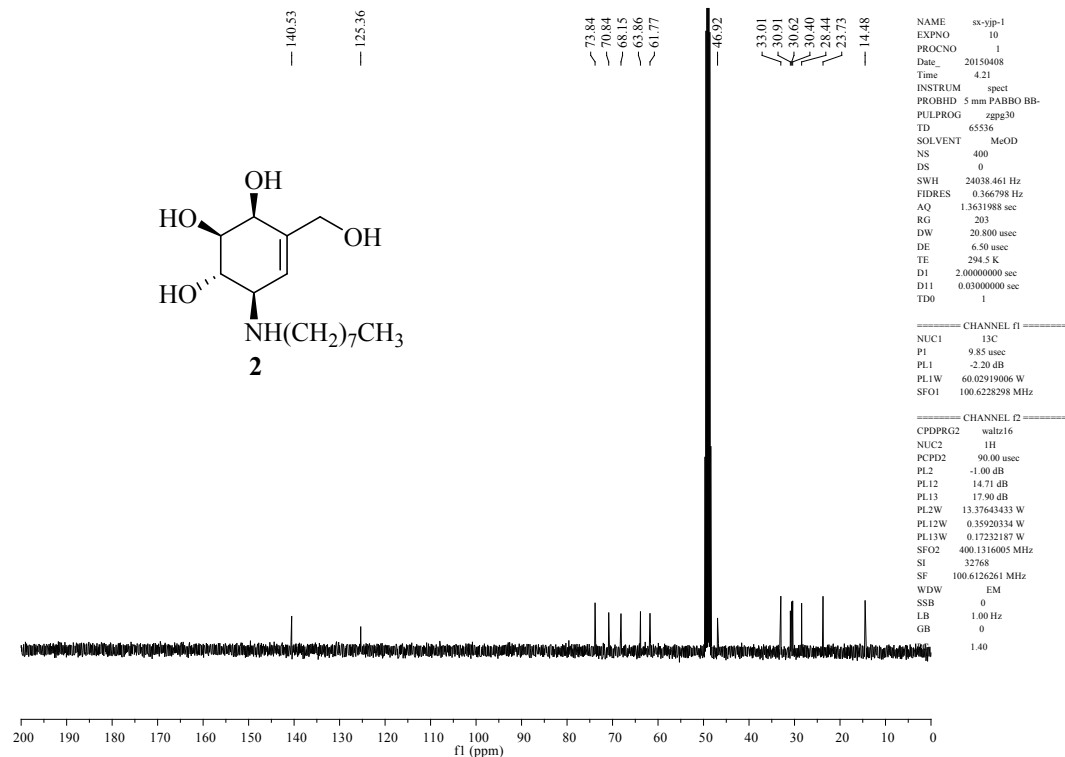

Supplement: c9ra09235h1.pdf [file c9ra09235h1.pdf]
